# Supplementary material for: Targeting pancreatic cancer by TAK-981: a SUMOylation inhibitor that activates the immune system and blocks cancer cell cycle progression in a preclinical model
Source: PubMed Central journal article supplement — Gut. 2022 Jan 24;71(11):2266–83. doi: 10.1136/gutjnl-2021-324834 (PMC9554032; doi:10.1136/gutjnl-2021-324834), 2022-01-24
Supplement: gutjnl-2021-324834supp002.pdf [file gutjnl-2021-324834supp002.pdf]

## Supplemental Figures

### **Targeting Pancreatic Cancer by TAK-981, a SUMOylation Inhibitor that Activates the Immune System and Blocks Cancer Cell Cycle Progression in a Preclinical Model**

Sumit Kumar<sup>1</sup>, Mark J.A. Schoonderwoerd<sup>2</sup>, Jessie S. Kroonen<sup>1</sup>, Ilona J. de Graaf<sup>1</sup>, Marjolein Sluijter<sup>3</sup>, Dina Ruano<sup>4</sup>, Román González-Prieto<sup>1</sup>, Matty Verlaan–de Vries<sup>1</sup>, Jasper Rip<sup>5</sup>, Ramon Arens<sup>5</sup>, Noel F.C.C. de Miranda<sup>4</sup>, Lukas J.A.C. Hawinkels<sup>2§</sup>, Thorbald van Hall<sup>3§</sup>, Alfred C.O. Vertegaal<sup>1\*</sup>

<sup>1</sup>Cell and Chemical Biology, Leiden University Medical Center, 2333, ZA, Leiden, the Netherlands.

<sup>2</sup>Gastroenterology and Hepatology, Leiden University Medical Center, 2333, ZA, Leiden, the Netherlands.

<sup>3</sup>Medical Oncology, Oncode Institute, Leiden University Medical Center, 2333, ZA, Leiden, the Netherlands.

<sup>4</sup>Pathology, Leiden University Medical Center, 2333, ZA, Leiden, the Netherlands.

<sup>5</sup>Immunology, Leiden University Medical Center, 2333, ZA, Leiden, the Netherlands.

§equal contributors

\*Email: vertegaal@lumc.nl

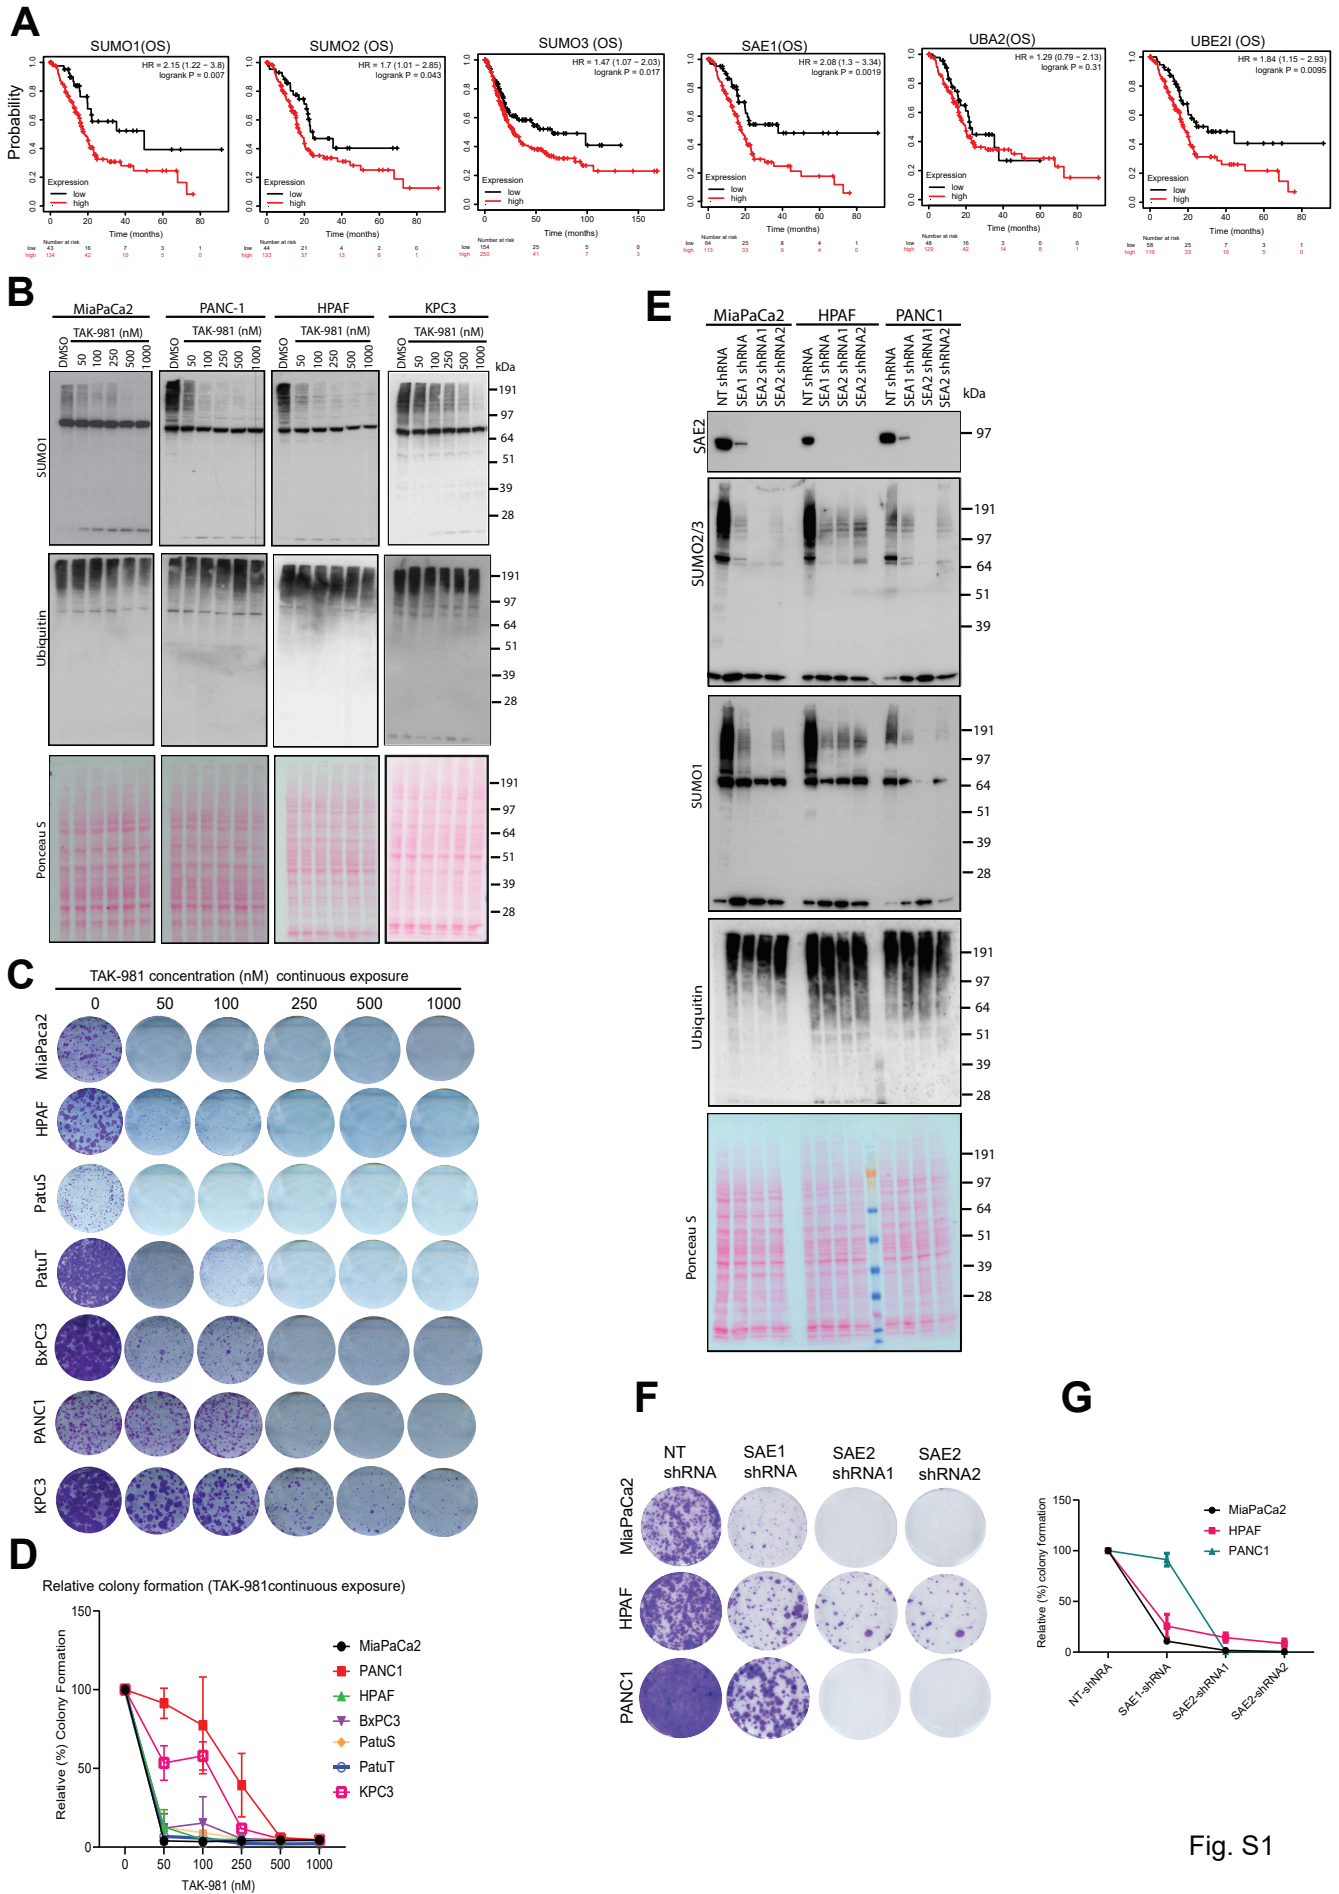

Fig. S1

**Figure S1. TAK-981 treatment and SUMO E1 knockdown block SUMO pathway activity and proliferation.**

**(A)** Kaplan-Meier plots showing overall survival of PDAC patients with high or low SUMO pathway gene expression. Patients with expression above the median are indicated in red lines, and patients with expression below the median are indicated in black lines. HR represents hazard ratio. The p-values are derived by log-rank tests.

**(B)** Western blot analysis of SUMO1 and ubiquitin levels in MiaPaCa2, PANC1, HPAF and KPC3, treated for 4 h with the indicated concentrations of TAK-981. Ponceau S staining was used as loading control.

**(C)** Human pancreatic cancer cell lines MiaPaCa2, PANC1, HPAF, BxPC3, PatuS, PatuT and mouse pancreatic cell line KPC3 were treated with the indicated concentrations of TAK-981 for 10 days and colony formation was determined by crystal violet staining.

**(D)** Line graphs represent the absorbance of solubilized crystal violet as mean with standard deviation (n=3).

**(E)** Knockdown of the SUMO-activating enzyme (SAE) in pancreatic cells MiaPaCa2, PANC1 and HPAF was carried out by stably expressing doxycycline inducible shRNAs generated against both SAE subunits SAE1 (SAE1 shRNA) and SAE2 (SAE2 shRNA1 and 2). Scrambled shRNA was used as a control (NT shRNA). Cells were treated with 100 ng/ml doxycycline for 4 days. Protein lysates were immunoblotted with SUMO2/3, SUMO1 and ubiquitin antibodies. Ponceau S staining was used as loading control.

**(F)** MiaPaCa2, PANC1 and HPAF cells stably expressing doxycycline inducible SAE knockdown constructs were plated at low density in 6 well plates. Cells were treated

with 100 ng/ml doxycycline for 10 days. Colony formation was determined by crystal violet staining.

**(G)** Line graphs represent the absorbance of solubilized crystal violet. Error bars denote standard deviation (n=4). Data related to Fig. 1.



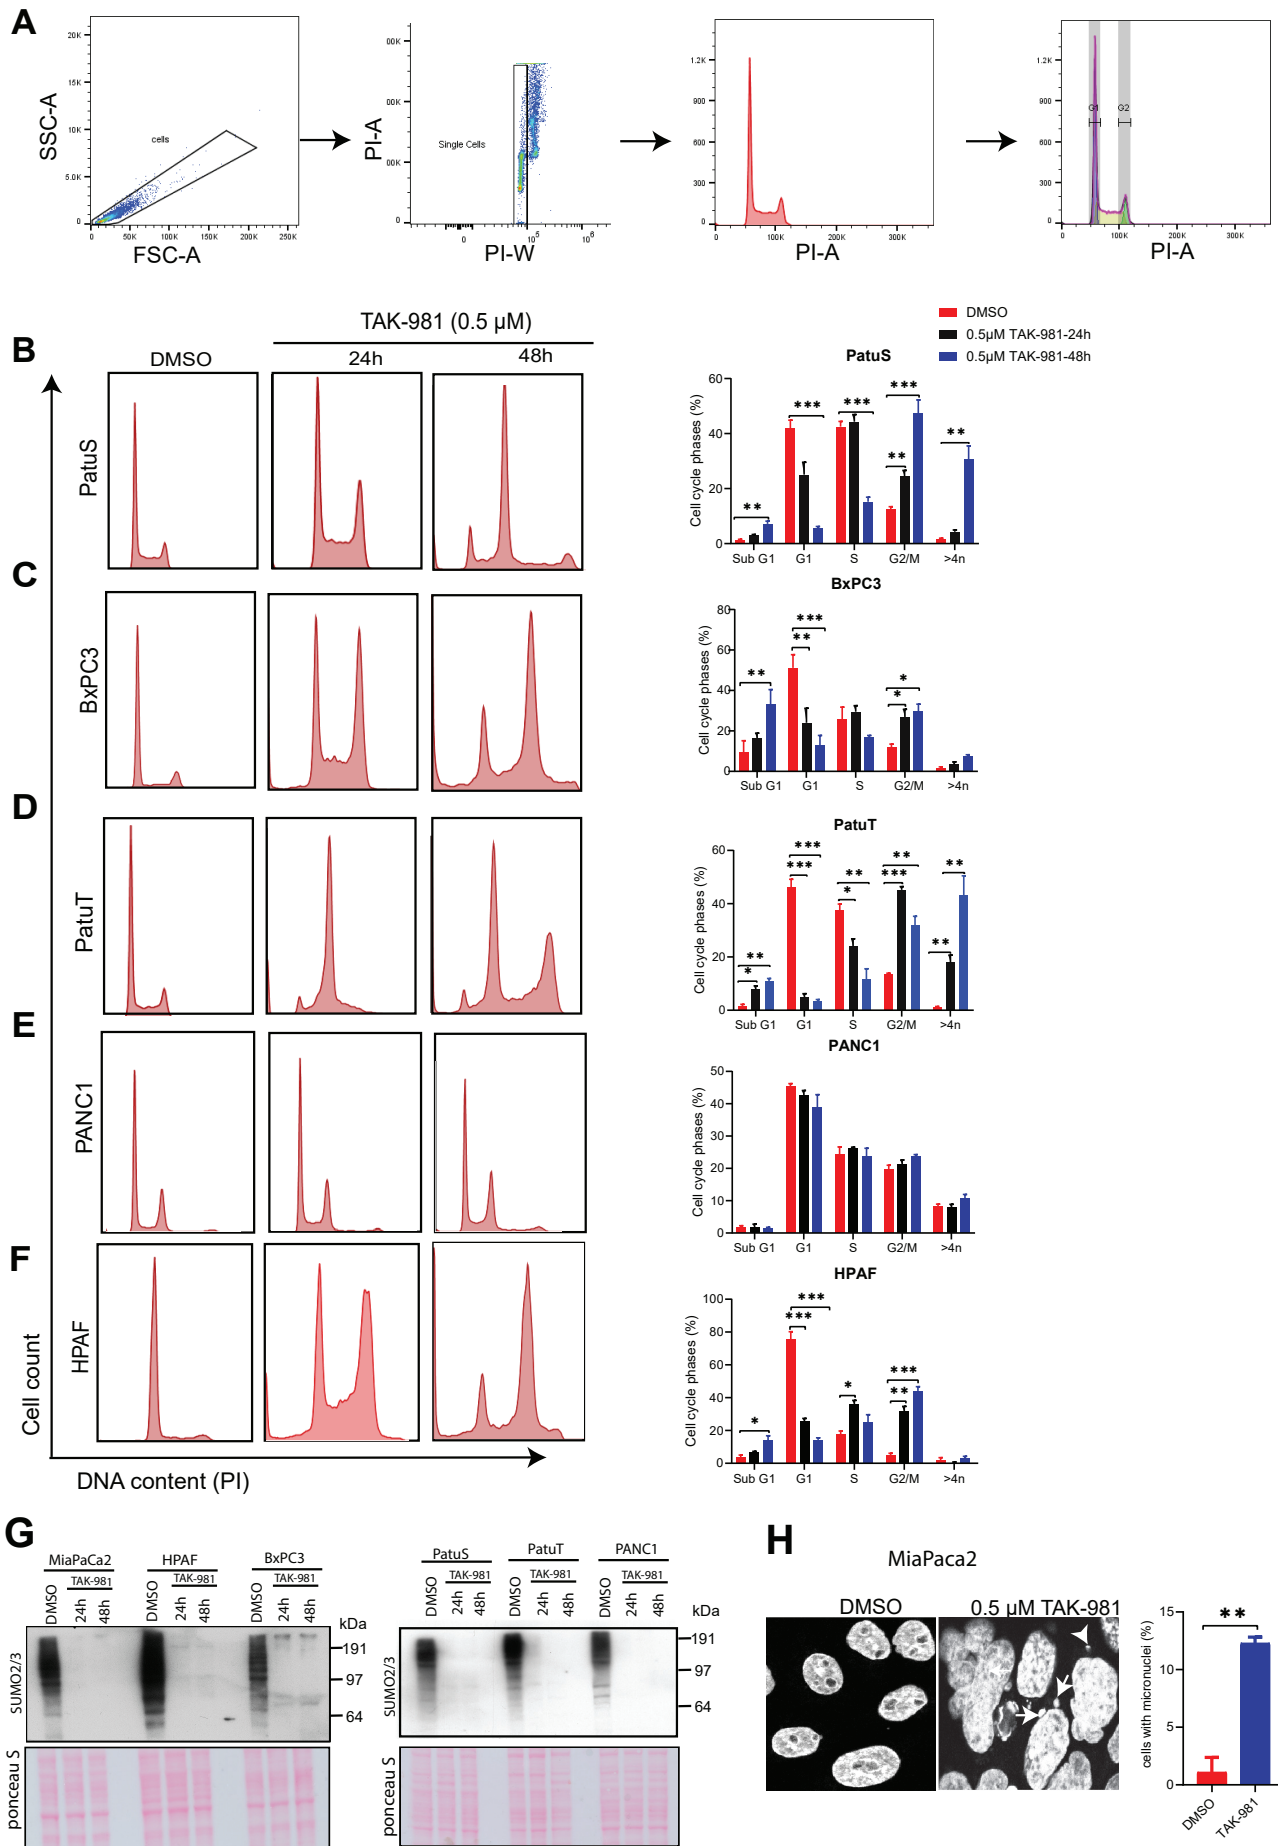

Fig. S2

**Figure S2. Cell cycle analysis after TAK-981 treatment.**

**(A)** Gating strategy for cell cycle analysis upon TAK-981 treatment.

**(B-F)** Cell cycle analysis of PANC1, HPAF, BxPC3, PatuS, PatuT after 0.5  $\mu$ M TAK-981 or 0.1% DMSO for 24 h and 48 h. Cellular DNA content was determined by propidium iodide staining and flowcytometry. Bar graphs showing the percentage of cells in each cell cycle phase (G1, S, G2/M and >4n) of three biological replicates ( $n=3$ ). Error bars represent SEM and  $p$ -values are derived from two-sided two sample  $t$ -tests. \* $p < 0.05$ ; \*\* $p < 0.01$ ; \*\*\* $p < 0.001$ ; \*\*\*\* $p < 0.0001$ .

**(G)** Western blot analysis of SUMO2/3 levels in lysates of MiaPaCa2, HPAF, BxPC3, PatuS, PatuT and PANC1 treated for 24 h and 48 h with TAK-981. Ponceau S staining was used as loading control.

**(H)** Untreated or 0.5  $\mu$ M TAK-981 treated MiaPaCa2 cells were fixed and stained with DAPI. The percentage of nuclei associated with one or more micronuclei are shown. More than 1000 cells were counted from two independent biological replicates. The bar graph shows the average percentage of cells that were associated with micronuclei. Error bars represent standard deviations and the  $p$  - value is derived from a two-sided two-sample  $t$ -test with  $n=2$  independent experiments. \* $p < 0.05$ ; \*\* $p < 0.01$ ; \*\*\* $p < 0.001$ ; \*\*\*\* $p < 0.0001$ . Representative micrographs are shown. Scale bars represent 10  $\mu$ m. Data related to Fig. 2.

A

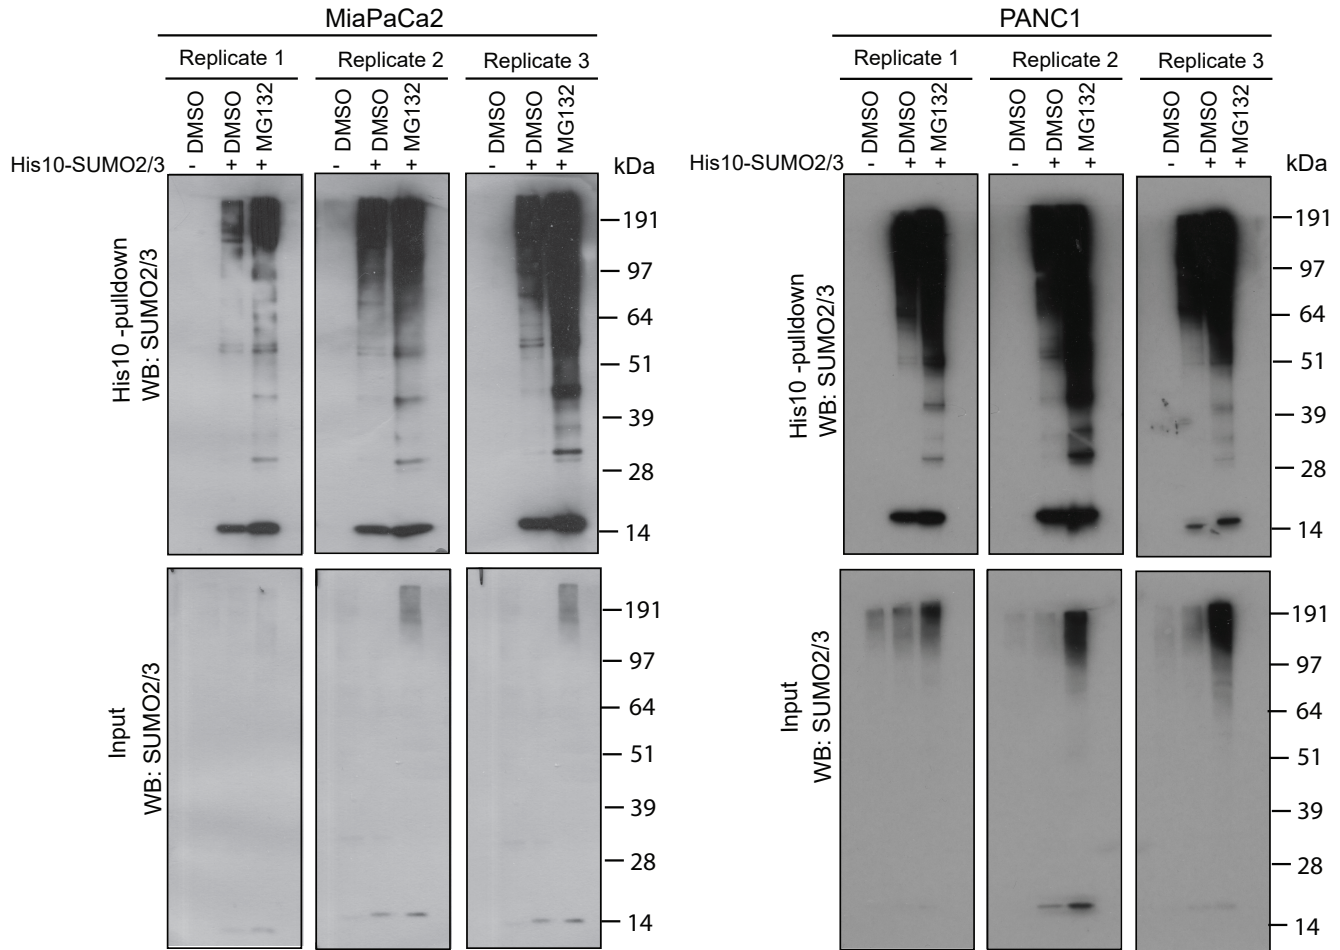

B

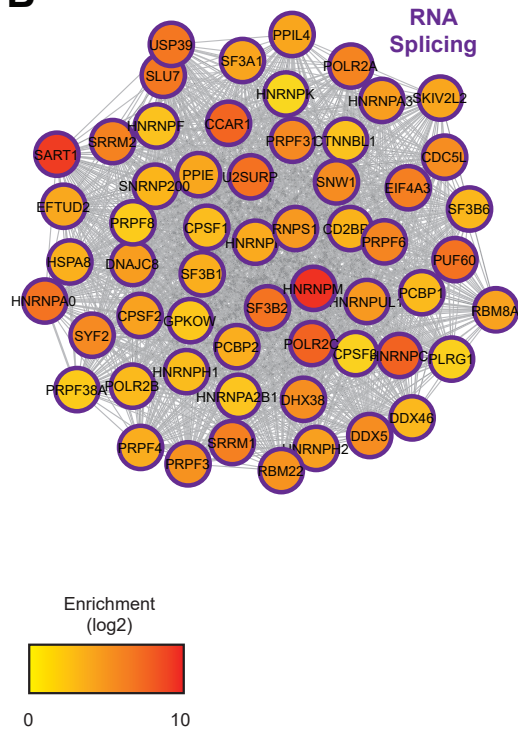

C

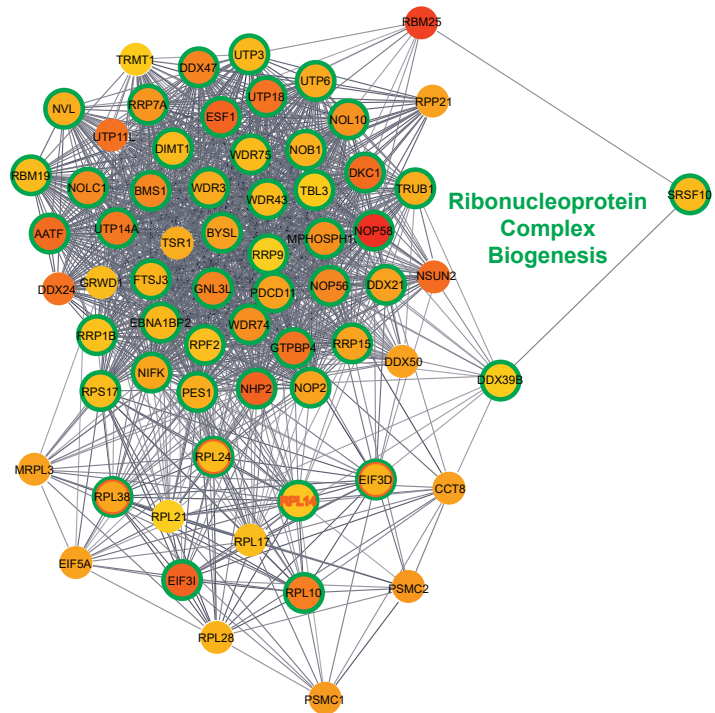

Fig. S3

**Figure S3. Analysis of SUMO2/3 target proteins in pancreatic cancer cell lines.**

**(A)** Immunoblot analysis of three replicates of MiaPaCa2 and PANC1 analyzed by LC-MS/MS. SUMO2/3 antibody was used to confirm efficient enrichment of SUMO conjugated proteins.

**(B-C)** STRING network analysis of SUMO2/3 target proteins. Clusters contain multiple proteins involved in RNA splicing and ribonucleoprotein complex biogenesis.

Data related to Fig. 2.

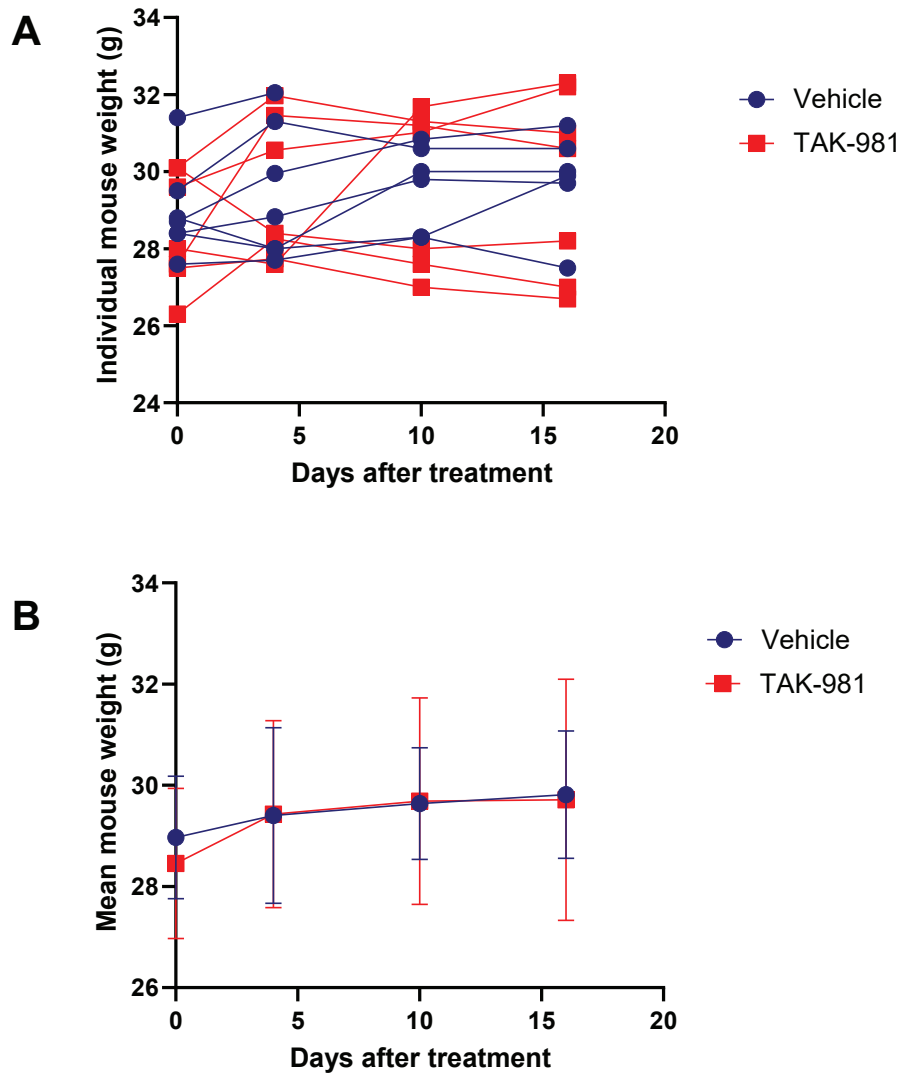

Fig. S4

**Figure S4. TAK-981 is well tolerated by mice.**

**(A-B)** C57BL/6 mice bearing KPC3 tumors were treated twice weekly with 7.5 mg/kg TAK-981 or solvent. Mice weight was monitored twice a week during treatment. Both mean and individual mouse weights are shown. Data related to Fig. 3.

**A** Gating strategy for KPC3 mice tumor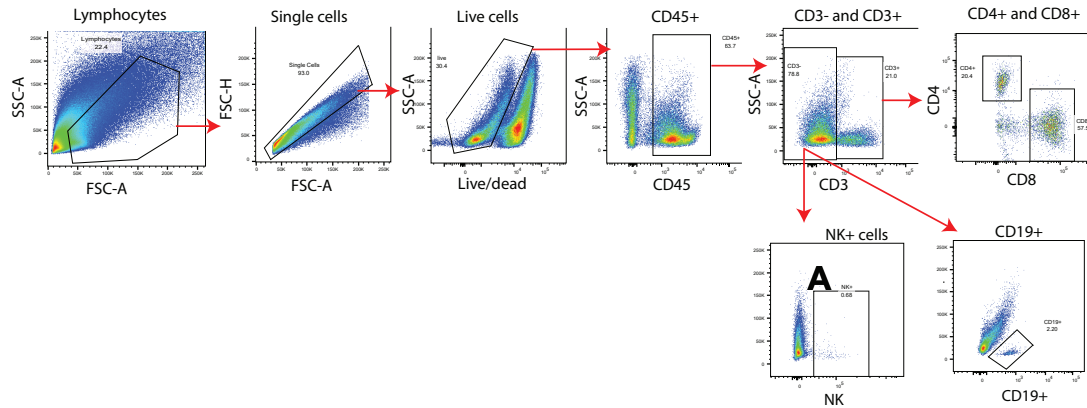**B** Lymphocytes gating strategy for naïve mouse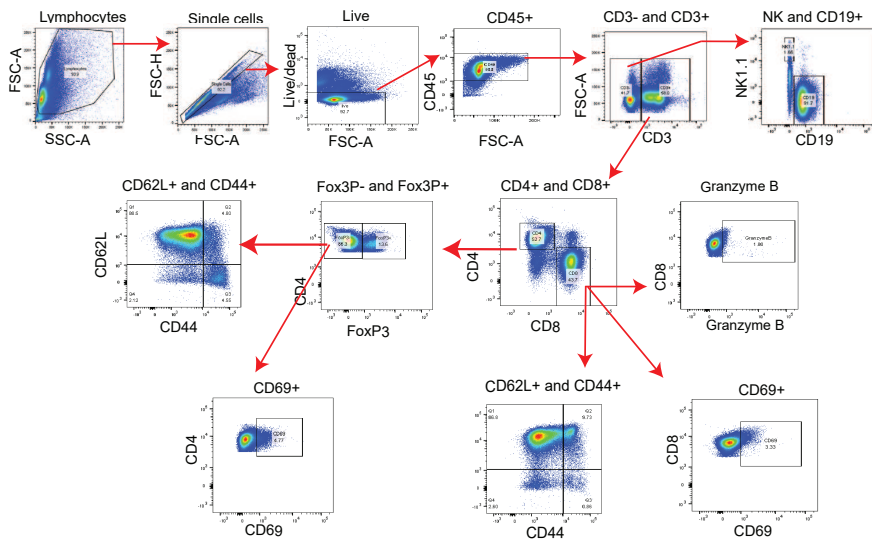**C** Myeloid cells gating strategy for naïve mouse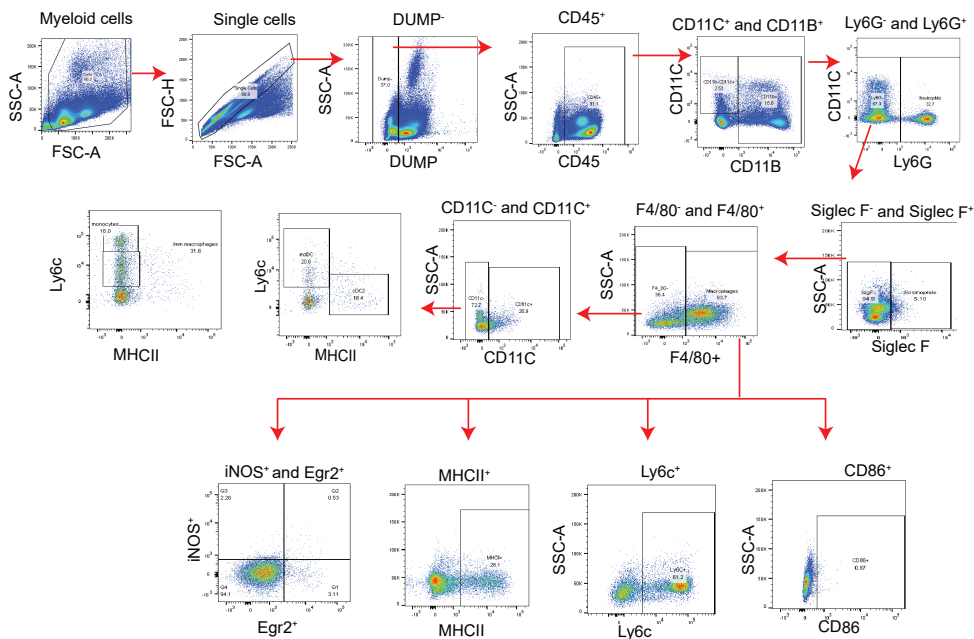

Fig. S5



**Figure S5. Gating strategy for flow cytometry analysis.**

**(A)** Gating strategy for flow cytometry analysis of lymphocytes from the KPC3 tumor samples.

**(B)** Gating strategy for the flow cytometry analysis of lymphocytes from peripheral blood, lymph nodes, spleen and bone marrow of naïve mice.

**(C)** Gating strategy for the flow cytometry analysis of myeloid cells from peripheral blood, lymph nodes, spleen and bone marrow of naïve mice. Data related to Fig. 4.

**A** Absolute cell count in blood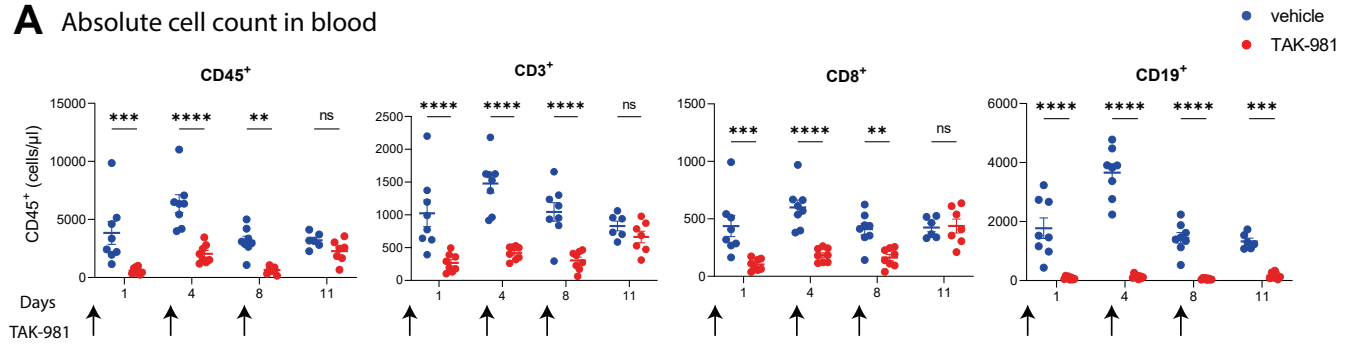**B** KPC3-PDAC lymph nodes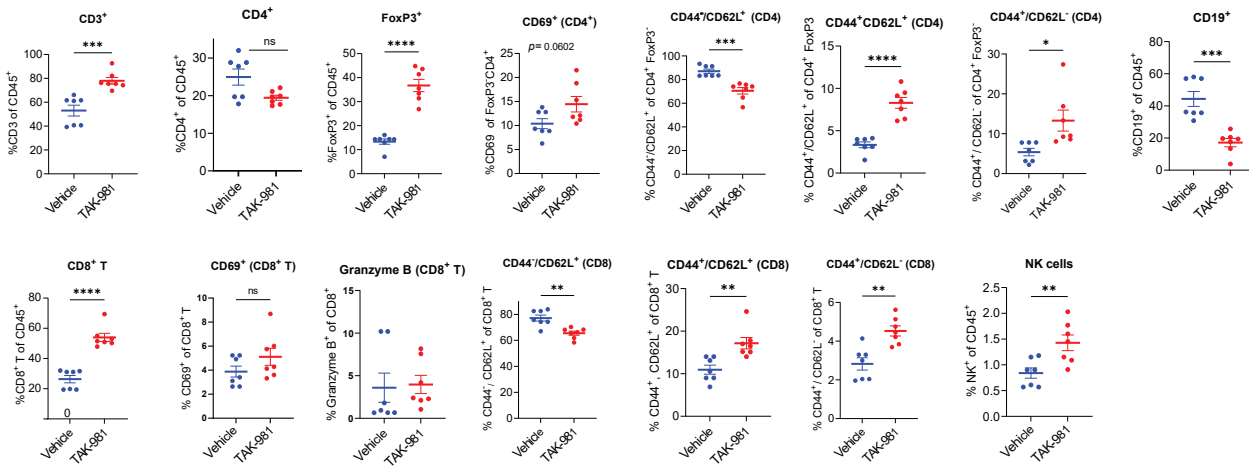**C** KPC3-PDAC- Spleen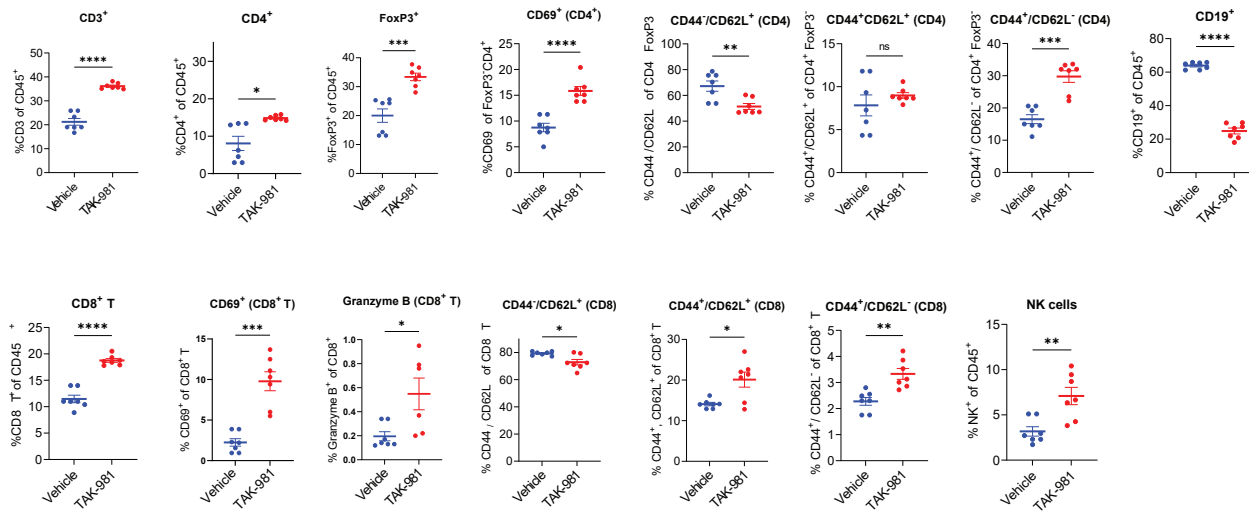

Fig. S6

**Figure S6. Flow cytometry analysis to monitor immune modulation by TAK-981 in KPC3 tumor bearing mice.**

(A) KPC3 tumor bearing C57BL/6 mice were treated with TAK-981 or vehicle control at days 0, 3, 7 and blood was harvested on days 1, 4, 8, 11. Absolute cell counts were determined using counting beads. (B) Lymph nodes (C) Spleen. Graphs represent mean and SEM. Statistical testing was performed using two way ANOVA with Sidak's multiple comparison test. \* $p < 0.05$ ; \*\* $p < 0.01$ ; \*\*\* $p < 0.001$ ; \*\*\*\* $p < 0.0001$ . Data related to Fig. 4.

**A Blood**

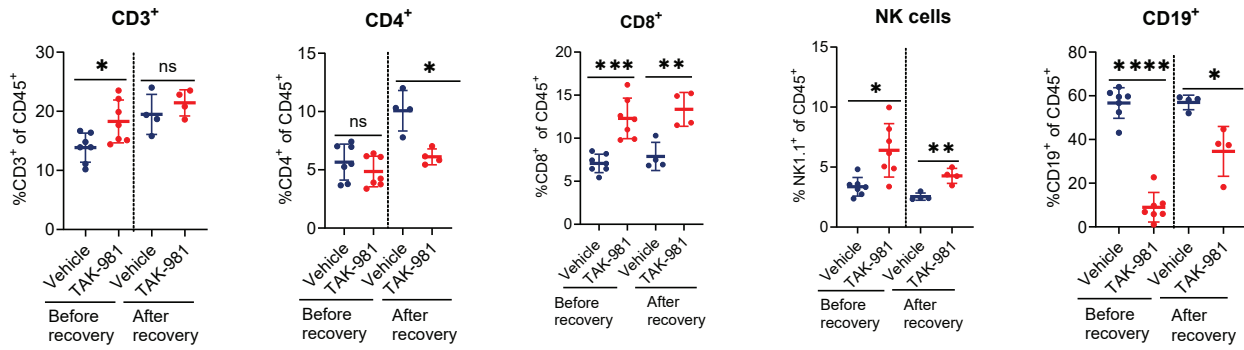

**B Lymph nodes**

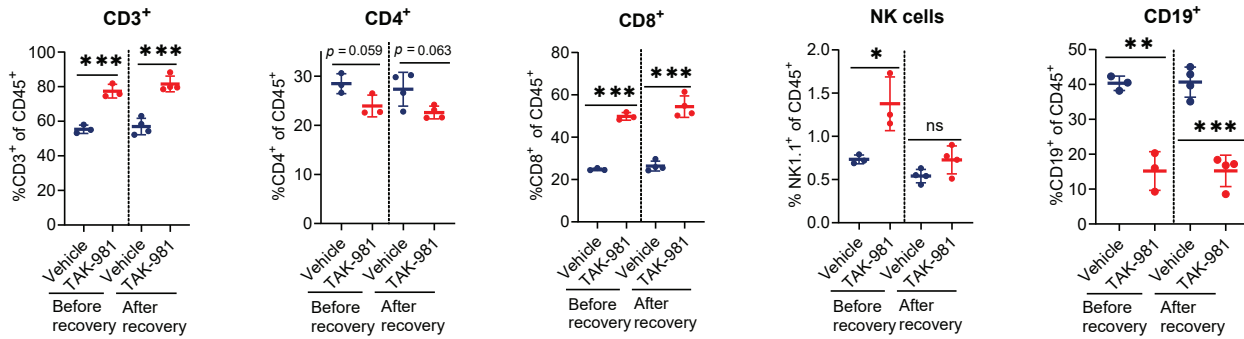

**C Spleen**

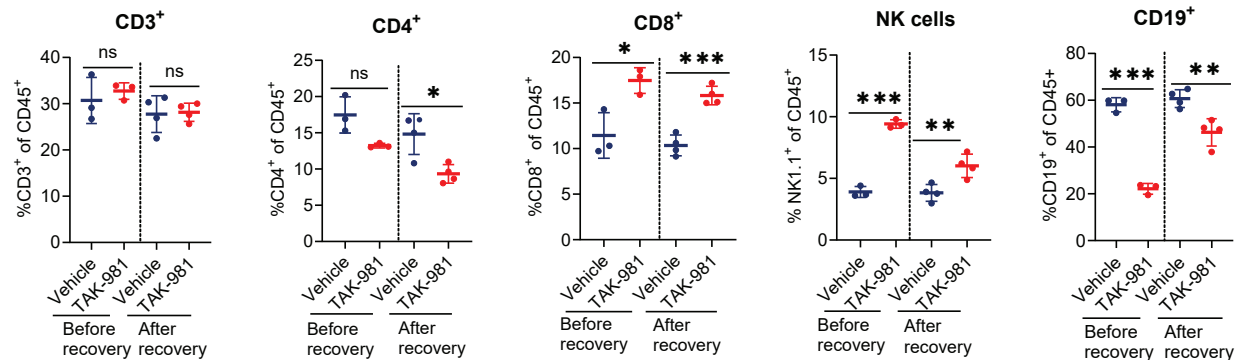

**D Bone marrow**

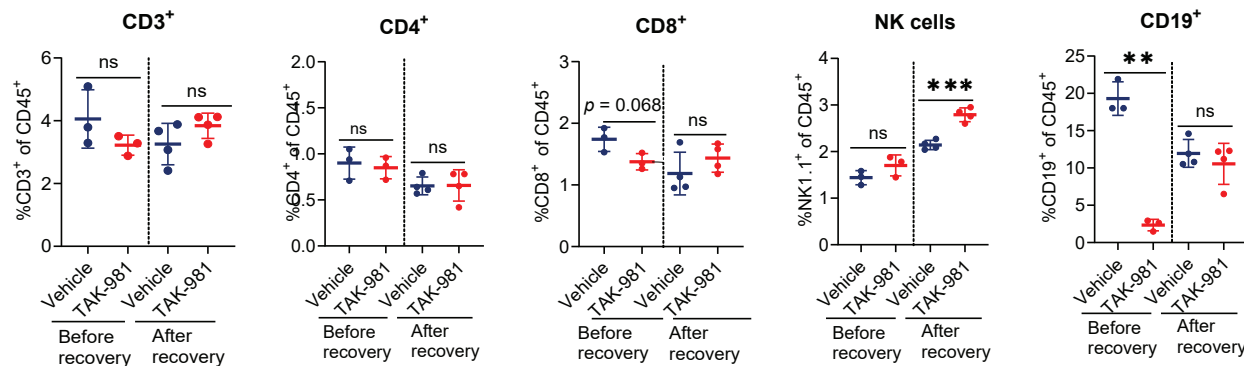

Fig. S7

**Figure S7. Flow cytometry analysis of lymphocytes from naïve mice.**

**(A-D)** Flow cytometry analysis of lymphocytes from **(A)** blood, **(B)** lymph nodes, **(C)** spleen and **(D)** bone marrow. C57BL/6 naïve mice were injected with either vehicle or 7.5 mg/kg TAK-981 twice a week on days 0, 3, 7, 10. Blood was collected on days 1, 4, 8, 11, 15 from the treated mice. Graphs represent mean and SD. Statistical testing was performed using unpaired two-tailed Welch's t test. \* $p < 0.05$ ; \*\* $p < 0.01$ ; \*\*\* $p < 0.001$ ; \*\*\*\* $p < 0.0001$ . Data related to Fig. 4.

## A Lymph nodes

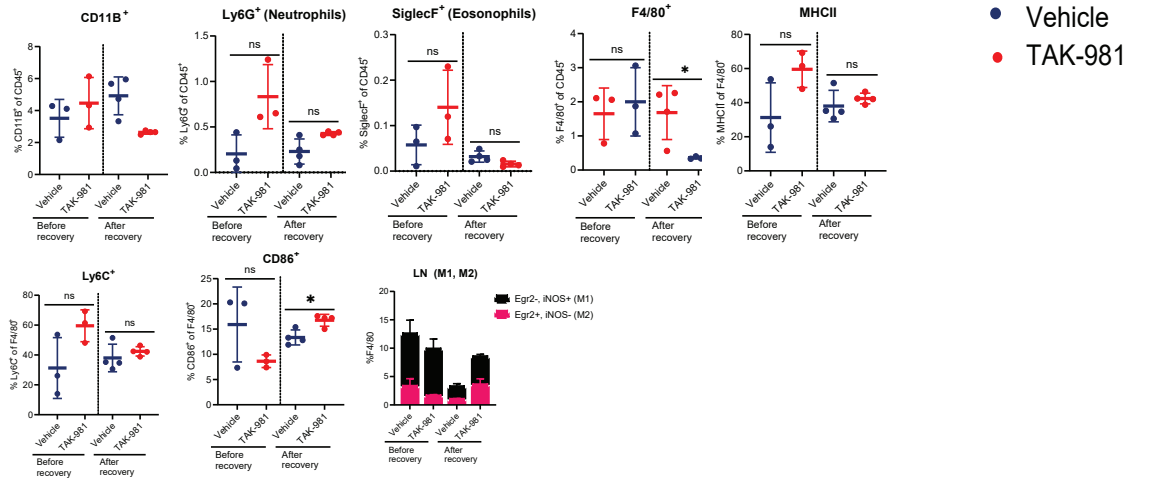

## B Spleen

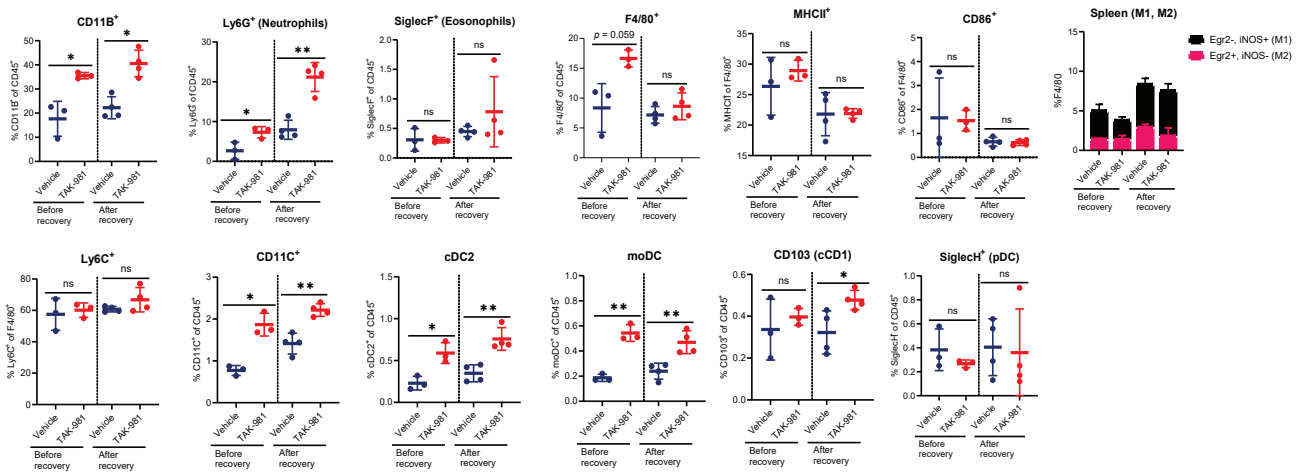

## C Bone marrow

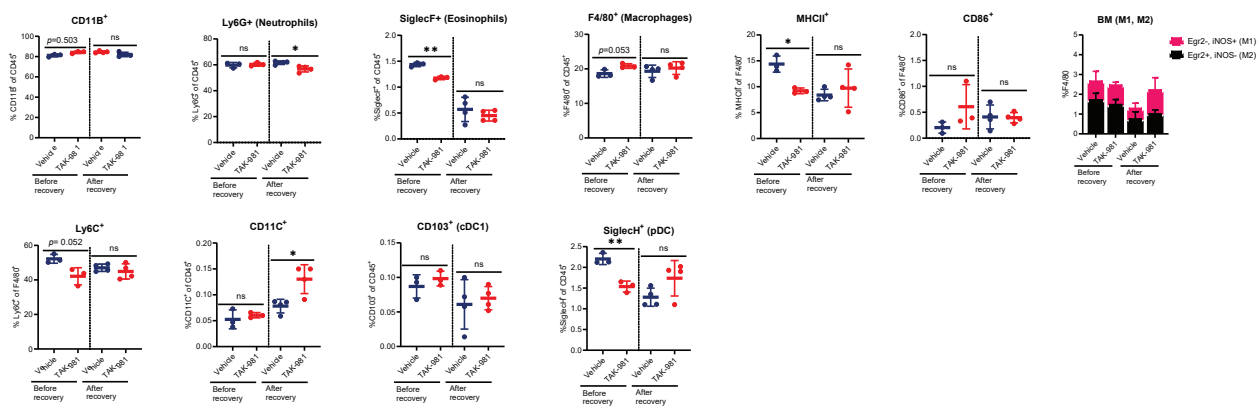

Fig. S8

**Figure S8. Flow cytometry analysis of myeloid cells.**

**(A-C)** Flow cytometry analysis of myeloid cells from **(A)** lymph nodes, **(B)** spleen and **(C)** bone marrow. Graphs represent mean and SD. Statistical testing was performed using unpaired two-tailed Welch's t test. \* $p < 0.05$ ; \*\* $p < 0.01$ ; \*\*\* $p < 0.001$ ; \*\*\*\* $p < 0.0001$ . Data related to Fig. 4.



## Gating strategy for B cell sub-types analysis in spleen

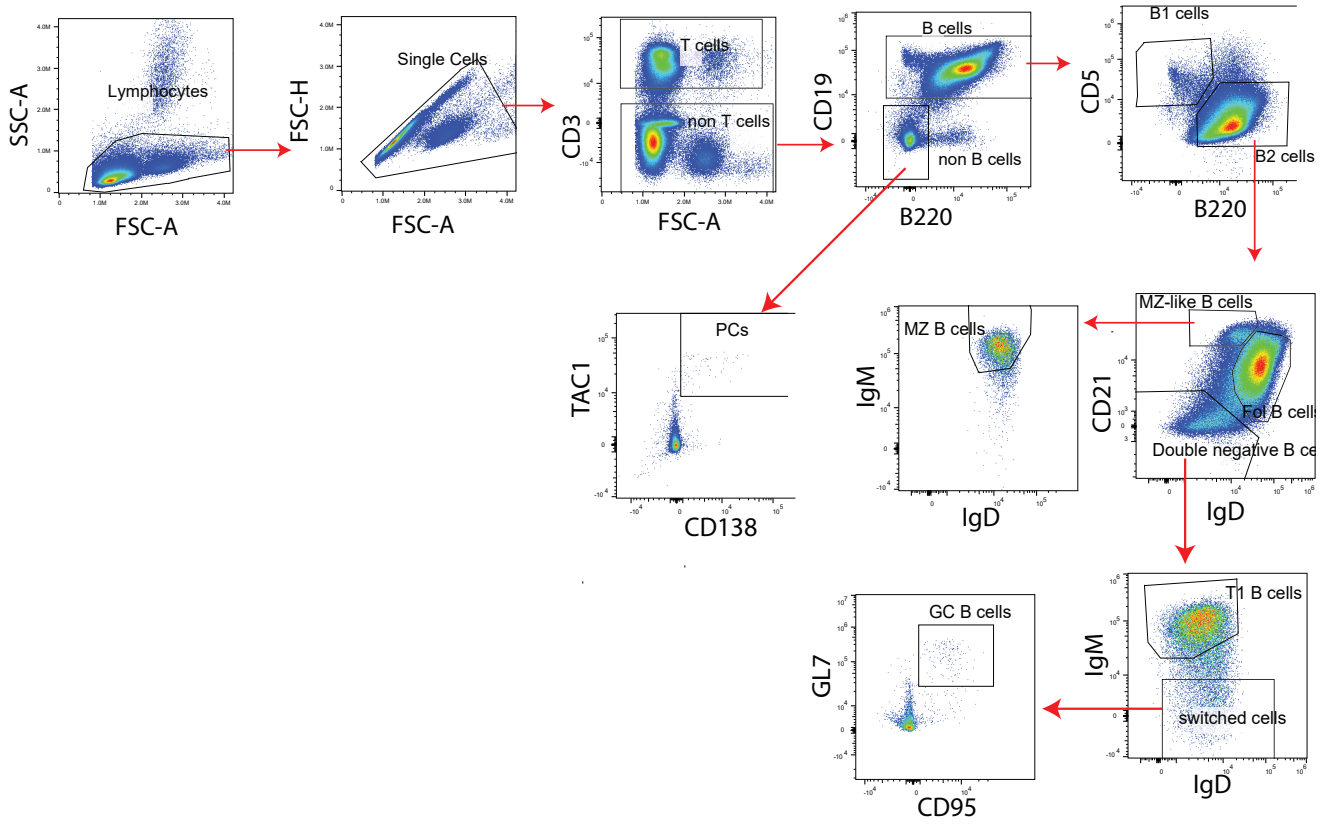

Fig. S9

**Figure S9. Gating strategy for detailed B cells analysis from spleen.**

Gating strategy for the flow cytometry analysis of B cell sub-sets from spleen of naïve mice after TAK-981 treatment. Data related to Fig. 5.

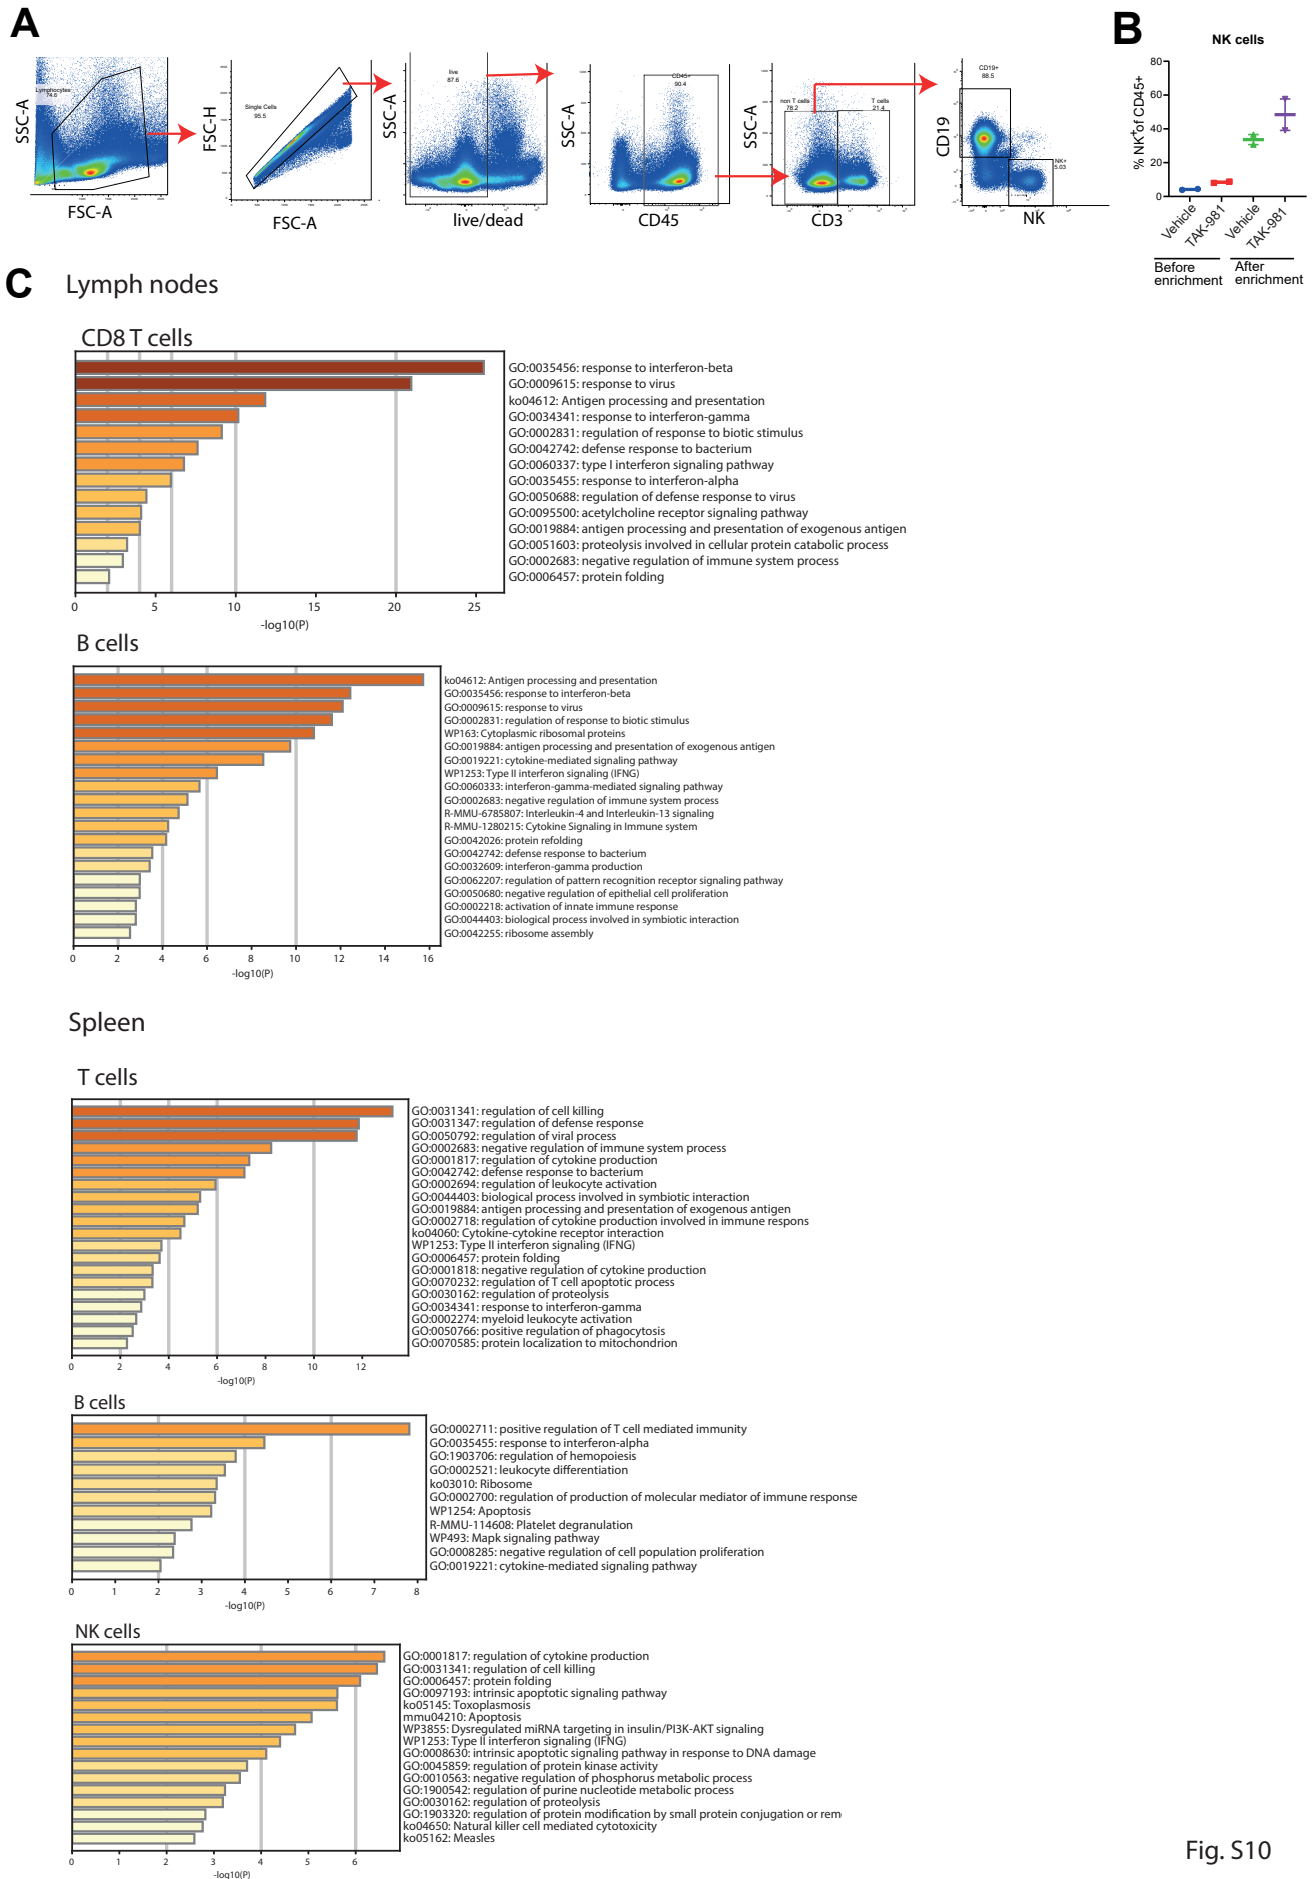

Fig. S10

**Figure S10. Single cell RNA sequencing analysis.**

- (A) Flow cytometry gating strategy for NK cell enrichment from spleen.
- (B) Graph showing NK cell enrichment in vehicle and TAK-981 treated mice (n=2).
- (C) Gene ontology (GO) analysis of upregulated genes in response to TAK-981 treatment in different sets of lymphocytes from lymph nodes and spleen. Data related to Fig. 6.

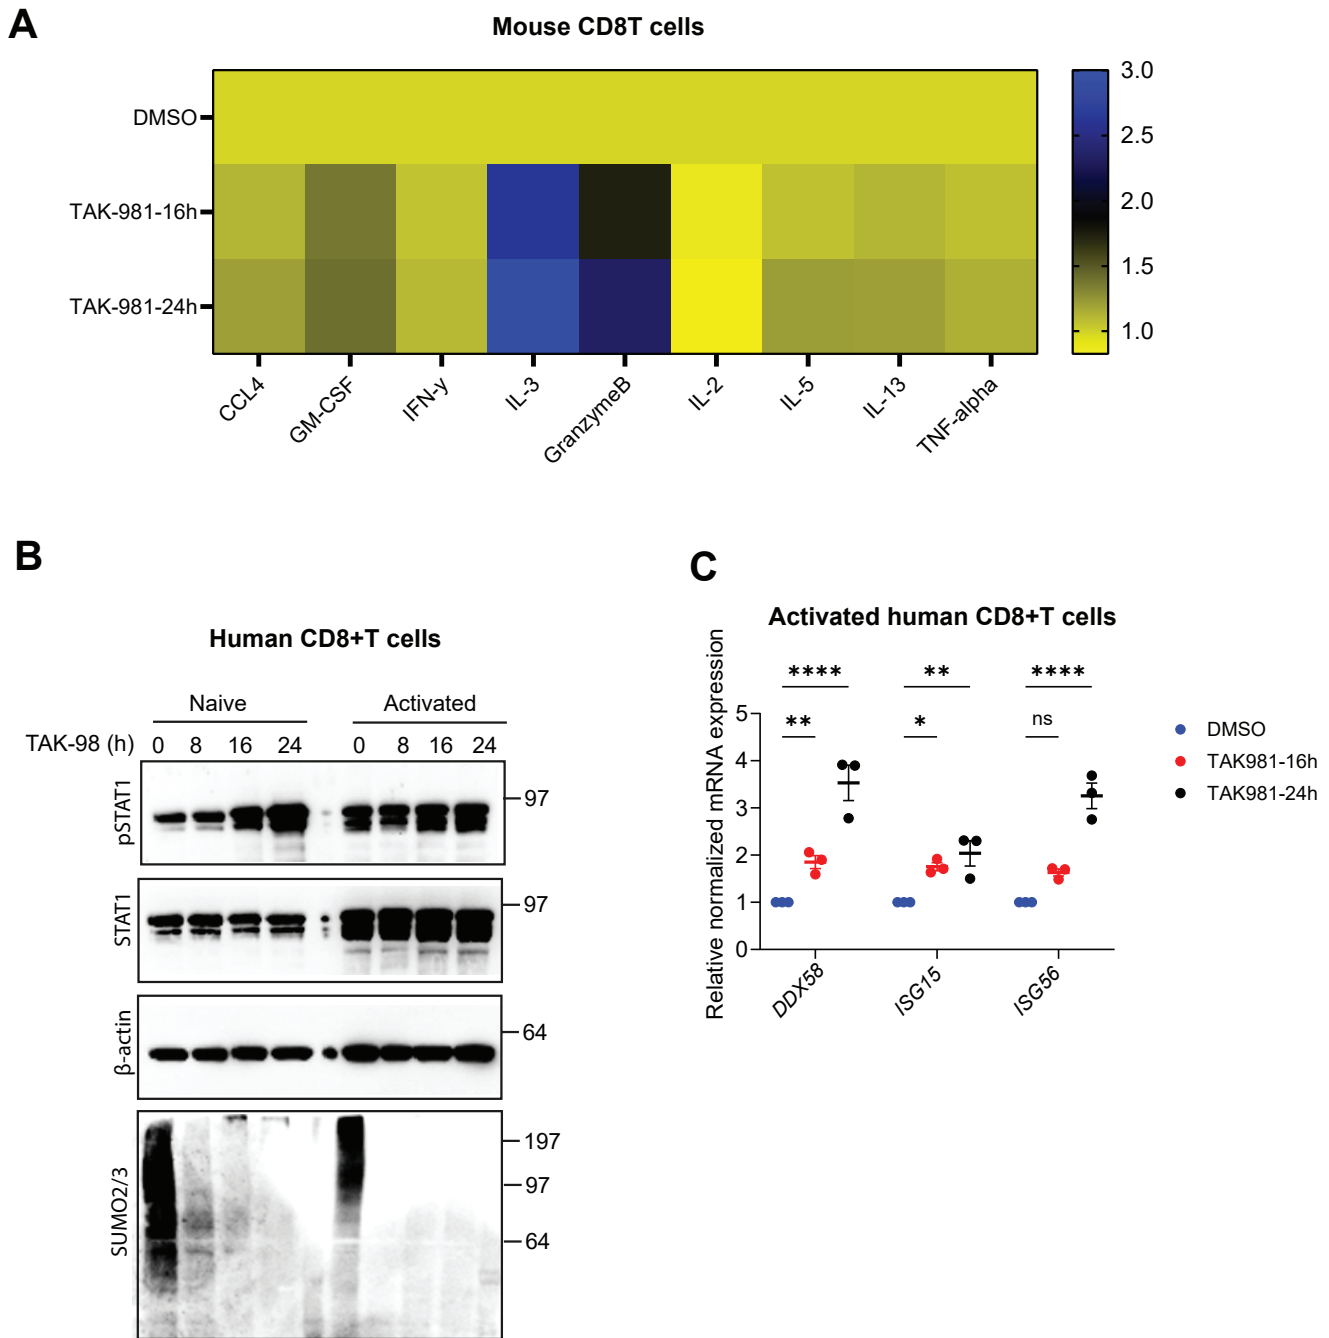

Fig. S11

**Figure S11. TAK-981 activates the interferon pathway in lymphocytes.**

**(A)** Heatmap of the relative expression of cytokines measured in cell culture medium of mouse CD8 T cells after 150 nM TAK-981 or DMSO treatment for the indicated time periods in two independent experiments.

**(B)** Western blot analysis showing STAT1 phosphorylation (pSTAT1) in human CD8 T cells *ex vivo* treated with 150 nM TAK-981 or DMSO control for the indicated time periods (n=2).

**(C)** qPCR analysis showing the expression of IFN-stimulate genes in activated human CD8 T cells treated with 150 nM TAK-981 for the indicated time periods. Statistical testing was performed using 2 way ANOVA with Dunnett's multiple comparisons test. Data are shown as mean±SEM. \*p < 0.05; \*\*p < 0.01; \*\*\*p < 0.001; \*\*\*\*p < 0.0001. (n=3 technical replicates). Data related to Fig. 7.

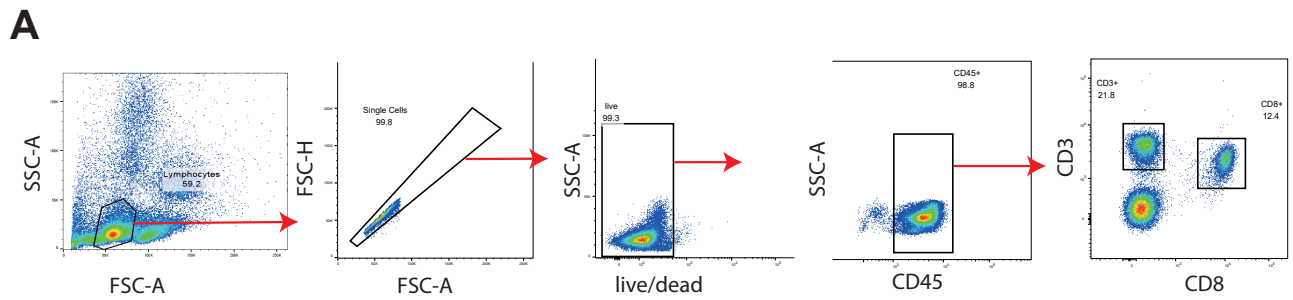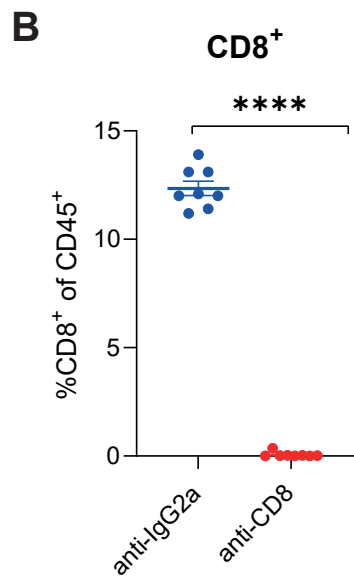

Fig. S12



**Figure S12. CD8 depletion in KPC3 tumor bearing mice.**

**(A)** Gating strategy for the flow cytometry analysis of CD8 cell depletion from KPC3 tumor bearing mice.

**(B)** Quantification of CD8 cell depletion in blood. C57BL/6 mice bearing KPC3 tumors were treated with CD8 neutralizing or isotype control antibody at days -3 and -1 via intraperitoneal injection. CD8 depletion was confirmed prior to TAK-981 treatment. Dot plots represent mean and SD. Statistical testing was performed using unpaired two-tailed Welch's t test. \*\*\*\*p < 0.000. Data related to Fig. 7E.
