# Supplementary material for: Targeting pancreatic cancer by TAK-981: a SUMOylation inhibitor that activates the immune system and blocks cancer cell cycle progression in a preclinical model
Source: PubMed Central journal article supplement — Gut. 2022 Jan 24;71(11):2266–83. doi: 10.1136/gutjnl-2021-324834 (PMC9554032; doi:10.1136/gutjnl-2021-324834), 2022-01-24
Supplement: gutjnl-2021-324834supp003.pdf [file gutjnl-2021-324834supp003.pdf]

| REAGENT or RESOURCE                        | Source                    | Catalog Numbers                       |
|--------------------------------------------|---------------------------|---------------------------------------|
| <b>Antibodies</b>                          |                           |                                       |
| SUMO2/3 mouse monoclonal                   | University of Iowa        | 8A2; RRID: AB_2198421                 |
| SUMO1 mouse monoclonal                     | Thermo Fisher Scientific  | 21C7, Cat# 33-2400<br>RRID:AB_2198257 |
| Ubiquitin mouse monoclonal                 | Santa Cruz Biotechnology  | Cat# sc-8017; RRID:AB_628423          |
| STAT1 rabbit monoclonal                    | Cell Signaling Technology | Cat# 14994; RRID:AB_2737027           |
| Phospho-STAT1 (Tyr701) rabbit monoclonal   | Cell Signaling Technology | Cat# 9167; RRID: AB_561284            |
| I-A/I-E-BV421(M5/114) mouse monoclonal     | BD Biosciences            | Cat# 562564; RRID: AB_2716857         |
| IgM-Biotin mouse monoclonal                | BD Biosciences            | Cat# 563018; RRID: AB_2737954         |
| CD62L-BV421(MEL-14) mouse monoclonal       | Biolegend                 | Cat# 104436; RRID: AB_10900082        |
| CD138-BV421 mouse monoclonal               | Biolegend                 | Cat# 142507; RRID:AB_11204257         |
| CD25-BV-480 (PC61)                         | BD Biosciences            | Cat# 566120; RRID:AB_2739522          |
| CD3-BV510 (145-2C11) mouse monoclonal      | BD Biosciences            | Cat# 563024; RRID: AB_2737959         |
| CD19-BV510 (1D3) mouse monoclonal          | BD Biosciences            | Cat# 562956; RRID: AB_2737915         |
| NK1.1-BV510 (PK136) mouse monoclonal       | Biolegend                 | Cat# 108738; RRID: AB_2562217         |
| Ly6C-BV605 (HK1.4) mouse monoclonal        | Biolegend                 | Cat# 128036; RRID: AB_2562353         |
| CD4-BV605 (RM4-5) mouse monoclonal         | Biolegend                 | Cat# 100547; RRID: AB_11125962        |
| Siglec-H-BV650 (440C) mouse monoclonal     | BD Biosciences            | Cat# 747672; RRID: AB_2744233         |
| NK1.1-BV650 (PK136) mouse monoclonal       | Biolegend                 | Cat# 108735; RRID: AB_11147949        |
| Siglec-F-BV711 (E50-2440) mouse monoclonal | BD Biosciences            | Cat# 740764; RRID: AB_2740427         |
| PD-L2-BV711 (TY25) mouse monoclonal        | BD Biosciences            | Cat# 107205; RRID: AB_2299418         |
| CD19-BV750 (6D5) mouse monoclonal          | Biolegend                 | Cat# 115561; RRID:AB_2813978          |
| Ly6G-BV785 (1A8) mouse monoclonal          | Biolegend                 | Cat# 127645; RRID: AB_2566317         |
| CD44-BV785 (IM-7) mouse monoclonal         | Biolegend                 | Cat# 103041; RRID: AB_11218802        |
| Streptavidin-BV786 mouse monoclonal        | BD Biosciences            | Cat# 563858; RRID: AB_2869529         |
| CD21/CD35-BUV395(7G6) mouse monoclonal     | BD Biosciences            | Cat# 740249; RRID:AB_2739995          |
| CD95-BUV661 (Jo2) mouse monoclonal         | BD Biosciences            | Cat# 751537; RRID: AB_2875532         |
| CD86-FITC (GL-1) mouse monoclonal          | eBiosciences (Invitrogen) | Cat# MA1-10300; RRID: AB_11153707     |
| CD19-FITC (1D3) mouse monoclonal           | eBiosciences (Invitrogen) | Cat# 11-0193-82; RRID: AB_657666      |
| GL-FITC(GL7) mouse monoclonal              | BD Biosciences            | Cat# 562080; RRID: AB_394981          |
| CD103-PerCP-Cy5.5 (2E7) mouse monoclonal   | Biolegend                 | Cat# 121415; RRID: AB_1574957         |
| CD8- PerCP-Cy5.5 (53-6.7) mouse monoclonal | Biolegend                 | Cat# 100733; RRID: AB_2075239         |
| CD23-PerCP-Cy5.5 (B3B4) mouse monoclonal   | Biolegend                 | Cat# 101617; RRID:AB_2562923          |
| Egr2-PE (Erogrn2) mouse monoclonal         | eBiosciences (Invitrogen) | Cat# 12-6691-82; RRID: AB_10717804    |
| TACI-PE (8F10) mouse monoclonal            | Biolegend                 | Cat# 133403; RRID: AB_2203542         |
| FoxP3-PE (FIK-16s) mouse monoclonal        | eBiosciences (Invitrogen) | Cat# 12-5773-82; RRID: AB_465936      |
| CD5-PE-Dazzle594 mouse monoclonal          | Biolegend                 | Cat# 100643; RRID: AB_2819771         |
| F4/80-PE-Cy5 (BM8) mouse monoclonal        | Biolegend                 | Cat# 123111; RRID: AB_893494          |
| CD3-PECF594 (145-2C11) mouse monoclonal    | BD Biosciences            | Cat# 562286 ; RRID: AB_11153307       |
| CD11b-PE-Cy7(M1/70) mouse monoclonal       | eBiosciences (Invitrogen) | Cat# MA1-10082 ; RRID: AB_11154207    |
| CD38-PE-Cy7(90) mouse monoclonal           | Biolegend                 | Cat# 102717; RRID: AB_2072892         |
| CD80-PE-Cy7(16-10A1) mouse monoclonal      | Biolegend                 | Cat# 104733; RRID: AB_2563112         |
| GranzymeB-PE-Cy7(NGZB) mouse monoclonal    | eBiosciences (Invitrogen) | Cat# 25-8898-82; RRID: AB_10853339    |
| IgD-pacific blue( 11-26C.2a)               | Biolegend                 | Cat# 405711; RRID: AB_1937245         |

|                                                  |                                                                                            |                                   |
|--------------------------------------------------|--------------------------------------------------------------------------------------------|-----------------------------------|
| iNOS-APC (CXNFT) mouse monoclonal                | eBiosciences (Invitrogen)                                                                  | Cat# 17-5920-82; RRID: AB_2573244 |
| CD69-APC (H1.2F3) mouse monoclonal               | Biolegend                                                                                  | Cat# 104513; RRID: AB_492844      |
| CD45-aF700 (30F11) mouse monoclonal              | Biolegend                                                                                  | Cat# 103127; RRID: AB_493714      |
| CXCR4-aF647(L276F12) mouse monoclonal            | Biolegend                                                                                  | Cat# 146503; RRID: AB_2562590     |
| B220-Af700 (RA3-6B2) mouse monoclonal            | Thermo Fischer Scientific                                                                  | Cat# 56-0452-82, RRID:AB_891458   |
| CD11c-APC-Cy7 (N418) mouse monoclonal            | Biolegend                                                                                  | Cat# 117323; RRID: AB_830646      |
| <b>Single cell sequencing Hashtag antibodies</b> |                                                                                            |                                   |
| C0301 Hashtag 1 (M1/42 + 30-F11)                 | Biolegend                                                                                  | Cat# 155861                       |
| C0302 Hashtag 2 (M1/42 + 30-F11)                 | Biolegend                                                                                  | Cat# 155863                       |
| C0303 Hashtag 3 (M1/42 + 30-F11)                 | Biolegend                                                                                  | Cat# 155865                       |
| C0301 Hashtag 4 (M1/42 + 30-F11)                 | Biolegend                                                                                  | Cat# 155867                       |
| C0302 Hashtag 5 (M1/42 + 30-F11)                 | Biolegend                                                                                  | Cat# 155869                       |
| C0303 Hashtag 6 (M1/42 + 30-F11)                 | Biolegend                                                                                  | Cat# 155871                       |
| C0301 Hashtag 7 (M1/42 + 30-F11)                 | Biolegend                                                                                  | Cat# 155873                       |
| C0302 Hashtag 9 (M1/42 + 30-F11)                 | Biolegend                                                                                  | Cat# 155877                       |
| <b>Chemicals and Inhibitors</b>                  |                                                                                            |                                   |
| TAK-981                                          | Millennium-Takeda Pharmaceuticals                                                          | N/A                               |
| Hydroxypropyl $\beta$ -cyclodextrin (HPBCD)      | Sigma-Aldrich                                                                              | Cat# H-107                        |
| MG132                                            | Sigma-Aldrich                                                                              | Cat# C2211                        |
| Doxycycline                                      | Sigma-Aldrich                                                                              | Cat# D9891                        |
| Geneticin (G418)                                 | Life technologies                                                                          | Cat# 11811-031                    |
| Propidium iodide                                 | Sigma-Aldrich                                                                              | Cat# P4170                        |
| <b>Deposited data</b>                            |                                                                                            |                                   |
| ProteomeXchange (via PRIDE database)             | This paper                                                                                 | PXD024521                         |
| NCBI's Gene Expression Omnibus                   | This paper                                                                                 | GSE189576                         |
| <b>Experimental models: cell lines</b>           |                                                                                            |                                   |
| MiaPaCa2                                         | Provided by Dr. Bernadette van den Hoogen Erasmus MC, Rotterdam, The Netherlands           | N/A                               |
| HPAF                                             | Provided by Dr. Bernadette van den Hoogen Erasmus MC, Rotterdam, The Netherlands           | N/A                               |
| PANC1                                            | Provided by Dr. Bernadette van den Hoogen Erasmus MC, Rotterdam, The Netherlands           | N/A                               |
| KPC3                                             | Provided by Dr. Lukas Hawinkels, Leiden University Medical Center, Leiden, The Netherlands | N/A                               |
| BxPC3                                            | Provided by Dr. Lukas Hawinkels, Leiden University Medical Center, Leiden, The Netherlands | N/A                               |
| PaTu 8988s                                       | Provided by Prof. Peter Ten Dijke, Leiden University                                       | N/A                               |

|                                                                                                                                                                                     |                                                                                                |     |
|-------------------------------------------------------------------------------------------------------------------------------------------------------------------------------------|------------------------------------------------------------------------------------------------|-----|
|                                                                                                                                                                                     | Medical Center, Leiden, The Netherlands                                                        |     |
| PaTu 8988t                                                                                                                                                                          | Provided by Prof. Peter Ten Dijke, Leiden University Medical Center, Leiden, The Netherlands   | N/A |
| VH10                                                                                                                                                                                | Provided by Dr. A.G. Jochemsen, Leiden University Medical Center, Leiden, The Netherlands      | N/A |
| Pmel CD8+ T cells                                                                                                                                                                   | Provided by Prof. Thorbald van Hall, Leiden University Medical Center, Leiden, The Netherlands | N/A |
| Human CD8+ T cells                                                                                                                                                                  | Provided by Prof. Thorbald van Hall, Leiden University Medical Center, Leiden, The Netherlands | N/A |
| MiaPaCa2-His10-SUMO2- IRES GFP                                                                                                                                                      | This paper                                                                                     | N/A |
| PANC1-His10-SUMO2- His10-SUMO2 IRES GFP                                                                                                                                             | This paper                                                                                     | N/A |
| <b>Experimental models: organisms/strains</b>                                                                                                                                       |                                                                                                |     |
| Mouse: C57BL/6                                                                                                                                                                      | Charles River Laboratories France                                                              | N/A |
| Mouse: Cg-Prkdc <sup>scid</sup> Il2rg <sup>tm1Wjl</sup> /SzJ (NSG)                                                                                                                  | In house breeding                                                                              | N/A |
| <b>Primers</b>                                                                                                                                                                      |                                                                                                |     |
| NTshRNA_FW<br>TCCCGAGGATAGACGCTTTAAATAATTCA<br>AGAGATTATTTAAAGCGTCTATCCTCTTTT<br>TC<br>NT shRNA_RV<br>TCGAGAAAAGAGGATAGACGCTTTAAAT<br>AATCTCTTGAATTATTTAAAGCGTCTATCC<br>TC          | (Eifler, K et al; 2018 Nature Commun.)                                                         | N/A |
| SAE1 shRNA_FW<br>TCCCGCTATGTTGGTCCTTTGTTTATTCAA<br>GAGATAAACAAAGGACCAACATAGCTTTT<br>TC<br>SAE1 shRNA_RV<br>CTCGAGAAAAGCTATGTTGGTCCTTTGT<br>TTATCTCTTGAATAAACAAAGGACCAACAT<br>AGC    | (Eifler, K et al; 2018 Nature Commun.)                                                         | N/A |
| SAE2 shRNA1_FW:<br>TCCCGCTGTATTGAAAGTAGGAATATTCA<br>AGAGATATTCCTACTTTCAATACAGCTTTT<br>TC<br>SAE2 shRNA1_RV<br>CTCGAGAAAAGCTGTATTGAAAGTAGGA<br>ATATCTCTTGAATATTCCTACTTTCAATAC<br>AGC | (Eifler, K et al; 2018 Nature Commun.)                                                         | N/A |
| SAE2 shRNA2_FW<br>TCCCGCACCAGATGTCCAAATTGAATTCA<br>AGAGATTCATTTGGACATCTGGTGCTTTT<br>TC<br>SAE2 shRNA2_RV<br>CTCGAGAAAAGCACCAGATGTCCAAATT<br>GAATCTCTTGAATTCATTTGGACATCTGG<br>TGC    | (Eifler, K et al; 2018 Nature Commun.)                                                         | N/A |
| <b>qPCR primers (Mouse)</b>                                                                                                                                                         |                                                                                                |     |
| <i>Iffa</i> -FW<br>GGATGTGACCTTCCTCAGACTC<br><i>Iffa</i> -RV                                                                                                                        | Sigma                                                                                          | N/A |

|                                                                                           |       |     |
|-------------------------------------------------------------------------------------------|-------|-----|
| ACCTTCTCCTGCGGGAATCCAA                                                                    |       |     |
| <i>Ifnβ</i> -FW<br>GCCTTTGCCATCCAAGAGATGC<br><i>Ifnβ</i> -RV<br>ACACTGTCTGCTGGTGGAGTTC    | Sigma | N/A |
| <i>Ifny</i> -FW<br>CAGCAACAGCAAGGCGAAAAAGG<br><i>Ifny</i> -Rev<br>TTCCGCTTCCTGAGGCTGGAT   | Sigma | N/A |
| <i>Irf7</i> -FW<br>CCTCTGCTTTCTAGTGATGCCG<br><i>Irf7</i> -RV<br>CGTAAACACGGTCTTGCTCCTG    | Sigma | N/A |
| <i>Gzmb</i> -FW<br>CAGGAGAAGACCCAGCAAGTCA<br><i>Gzmb</i> -Rev<br>CTCACAGCTCTAGTCCTCTTGG   | Sigma | N/A |
| <i>Prf1</i> -FW<br>ACACAGTAGAGTGTGCGCATGTAC<br><i>Prf1</i> -RV<br>GTGGAGCTGTTAAAGTTGCGGG  | Sigma | N/A |
| <i>Ifit1</i> -FW<br>CTGGACAAGGTGGAGAAGGT<br><i>Ifit1</i> -RV<br>AGGGTTTTCTGGCTCCACTT      | Sigma | N/A |
| <i>Ifg15</i> -FW<br>CATCCTGGTGAGGAACGAAAGG<br><i>Ifg15</i> -RV<br>CTCAGCCAGAACTGGTCTTCGT  | Sigma | N/A |
| <i>Ddx58</i> -FW<br>AAGGCCACAGTTGATCCAAA<br><i>Ddx58</i> -RV<br>TTGGCCAGTTTTCTTGTCG       | Sing  | N/A |
| <i>Ubc</i> -FW<br>GCCAGTGTTA CCACCAAGA<br><i>Ubc</i> -RV<br>CCCATCACAC CCAAGAACA          | Sigma | N/A |
| <i>Mzt2</i> -FW<br>TCGGTGCCCATATCTCTGTC<br><i>Mzt2</i> -RV<br>CTGCTTCGGGAGTTGCTTTT        | Sigma | N/A |
| <i>Ptp4a2</i> -FW<br>AGCCCCTGTGGAGATCTCTT<br><i>Ptp4a2</i> -RV<br>AGCATCACAACCTCGAACCA    | Sigma | N/A |
| <b>qPCR primers (Human)</b>                                                               |       |     |
| <i>ISG15</i> -FW<br>CAGCGAACTCATCTTTGCCAGTA<br><i>ISG15</i> -RV<br>CCAGCATCTTCACCGTCAGG   | Sigma | N/A |
| <i>ISG56</i> -FW<br>GGGCAGACTGGCAGAAGC<br><i>ISG56</i> -RV<br>TATAGCGGAAGGGATTTGAAAGC     | Sing  | N/A |
| <i>DDX58</i> -FW<br>CACCTCAGTTGCTGATGAAGGC<br><i>DDX58</i> -RV<br>GTCAGAAGGAAGCACTTGCTACC | Sigma | N/A |
| <i>TBP</i> -FW<br>CGGCTGTTTAACTTCGCTTC<br><i>TBP</i> -RV<br>CACACGCCAAGAAACAGTGA          | Sigma | N/A |
| <i>ActinB</i> -FW<br>CGGGACCTGACTGACTACCTC                                                | Sigma | N/A |

|                                                                                     |                                       |                                                                                                                                                                                 |
|-------------------------------------------------------------------------------------|---------------------------------------|---------------------------------------------------------------------------------------------------------------------------------------------------------------------------------|
| <i>ActinB</i> -RV<br>CTCCTTAATGTCACGCACGATTC                                        |                                       |                                                                                                                                                                                 |
| <i>SRPR</i> -FW<br>CATTGCTTTTGCACGTAACCAA<br><i>SRPR</i> -Rev<br>ATTGTCTTGCATGCGGCC | Sigma                                 | N/A                                                                                                                                                                             |
| <i>RPS11</i> -FW<br>AAGCAGCCGACCATCTTTCA<br><i>RPS11</i> -RV<br>CGGGAGCTTCTCCTTGCC  | Sigma                                 | N/A                                                                                                                                                                             |
| <b>Software and algorithms</b>                                                      |                                       |                                                                                                                                                                                 |
| MaxQuant v1.6.14                                                                    | Max Planck Institute                  | <a href="https://www.maxquant.org">https://www.maxquant.org</a>                                                                                                                 |
| Perseus, version v1.6.14                                                            | Max Planck Institute                  | <a href="https://www.maxquant.org">https://www.maxquant.org</a>                                                                                                                 |
| Cytoscape v3.8+ stringApp v1.6.0, + MCODE v2.0.0                                    | National Resource for Network Biology | <a href="https://cytoscape.org">https://cytoscape.org</a>                                                                                                                       |
| GraphPad Prism v8                                                                   | GraphPad Software                     | <a href="http://www.graphpad.com">www.graphpad.com</a>                                                                                                                          |
| Leica LAS X v3.7.0                                                                  | Leica                                 | <a href="https://www.leica-microsystems.com/products/microscope-software/p/leica-las-x-ls">https://www.leica-microsystems.com/products/microscope-software/p/leica-las-x-ls</a> |
| ImageJ                                                                              | Fiji                                  | <a href="https://imagej.net/Welcome">https://imagej.net/Welcome</a>                                                                                                             |
| FlowJo v10                                                                          | TreeStar                              | <a href="https://www.flowjo.com/solutions/flowjo">https://www.flowjo.com/solutions/flowjo</a>                                                                                   |

**KEY RESOURCES TABLE**
